# Supplementary material
Source: PubMed Central journal article supplement (PMC2972931)
Supplement: 1009480107_pnas.201009480SI.pdf [file 1009480107_pnas.201009480SI.pdf]

# Supporting Information

Coleman and Chisholm 10.1073/pnas.1009480107

## SI Text

The pyrosequencing reads have been deposited in the NCBI Sequence Read Archive, <http://www.ncbi.nlm.nih.gov>, under the following accession numbers: SRX007372 (HOT186 25m), SRX007369 (HOT186 75m), SRX007370 (HOT186 110m), SRX008032 (BATS216 20m), SRX008033 (BATS216 50m),

SRX008035 (BATS216 100m). Shotgun sequence libraries have been deposited in the NCBI Trace Archive with the following trace identifiers: 2243992048-2244135183 (BATS216 20m), 2244135184-2244269775 (BATS216 50m), 2281908320-2281966591 (HOT186 25m), 2281966591-2282003263 and 2282006336-2282042335 (HOT186 75m).

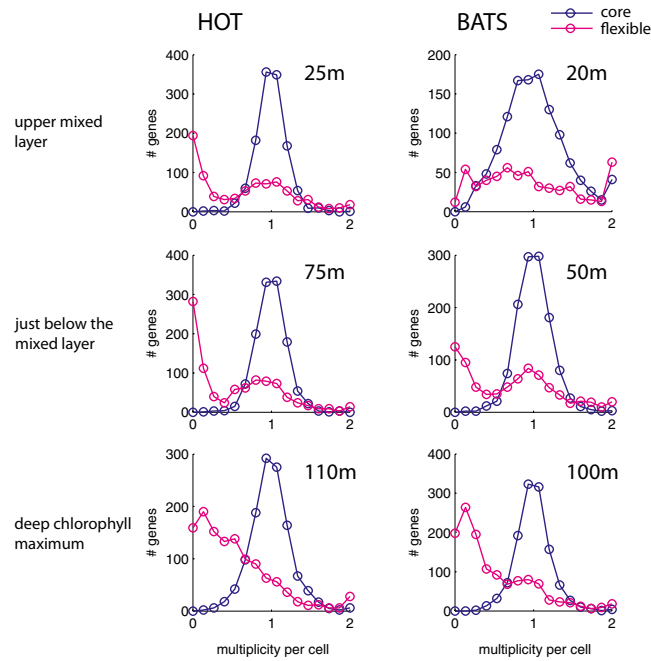

**Fig. S1.** Copies per *Prochlorococcus* cell of core and flexible genes at each depth. Core genes, defined using whole genome sequences from cultured isolates, also are one copy per cell in these populations, whereas many flexible genes are rare (present in only a subset of cells) at any given depth. Note that the 110-m sample from HOTS and the 20-m sample from BATS each had significantly fewer *Prochlorococcus* reads (Table S1), resulting in the unusual shape of the flexible gene distribution.
